# Supplementary material for: AMPK Amplifies IL2–STAT5 Signaling to Maintain Stability of Regulatory T Cells in Aged Mice
Source: MDPI journal article supplement (doi:10.3390/ijms232012384), 2022-10-16
Supplement: s1 [file s1]

**Table S1.** The real-time PCR primer list, along with the sequences.

| <b>Species</b> | <b>Genes</b> | <b>Forward (5'-3')</b> | <b>Reverse (5'-3')</b> |
|----------------|--------------|------------------------|------------------------|
| Mouse          | Tbet         | AGCAAGGACGGCGAATGTT    | GGGTGGACATATAAGCGGTTC  |
| Mouse          | Roryt        | GGAGCTCTGCCAGAATGAGC   | CAAGGCTCGAAACAGCTCCAC  |
| Mouse          | Foxp3        | GGCCCTTCTCCAGGACAGA    | GCTGATCATGGCTGGGTTGT   |
| Mouse          | Gata3        | AGATGGCACGGGACACTACC   | GTGGTGGTCTGACAGTTCCG   |
