# Supplementary material for: AMPK Amplifies IL2–STAT5 Signaling to Maintain Stability of Regulatory T Cells in Aged Mice
Source: MDPI journal article supplement (doi:10.3390/ijms232012384), 2022-10-16
Supplement: s1 [file s1]

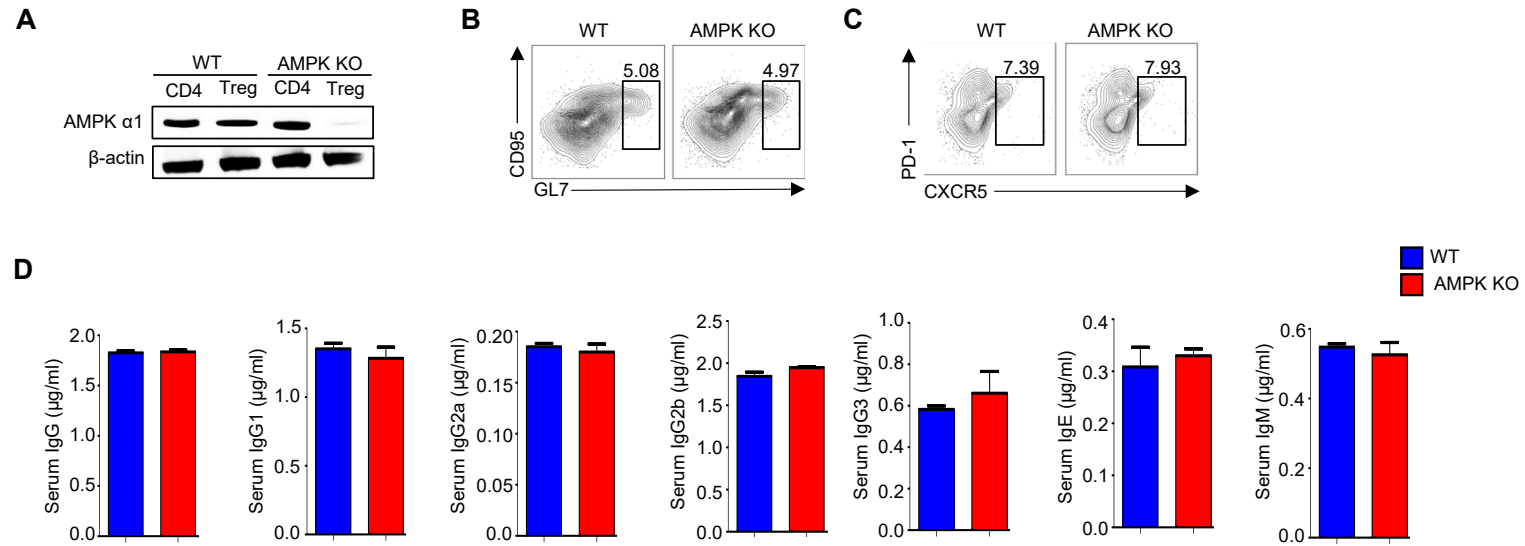

**Figure S1: WT and AMPK Ko mice are comparable in terms of humoral immunity** (A) Analysis of total AMPK $\alpha$ 1 in CD4 and Tregs in WT and AMPK-KO mice by western blotting. (B) Representative flow cytometric plot showing the percentage of (B) germinal center B-cells and (C) Tfh cells in payer's patches of WT and AMPK-KO mice (D) Concentration of IgG (1:20000), IgG1 (1:20000), IgG2a (1:20000), IgG2b (1:20000), IgG3 (1:20000), IgE (1:20) and IgM (1:5000) in serum from WT and AMPK-KO mice.

**A**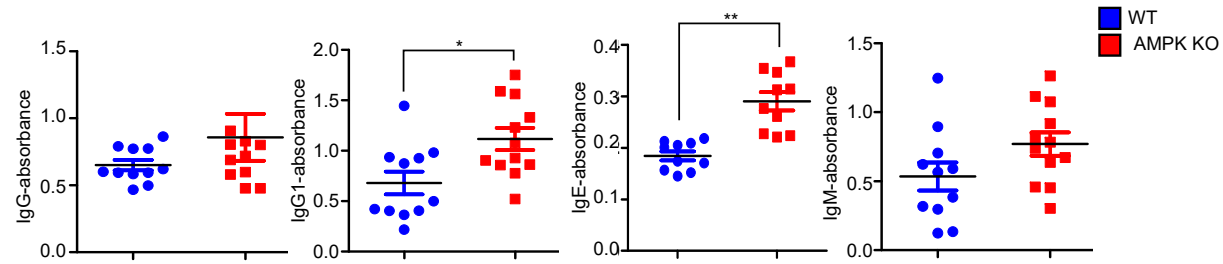**B**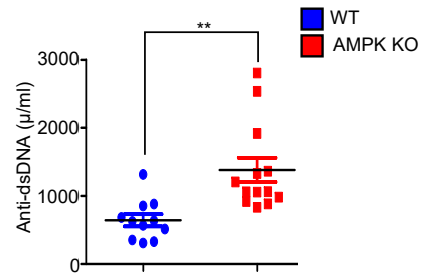

**Figure S2: Alteration in humoral immunity in aged mice (A)** Absorbance of IgG (1:20000), IgG1 (1:20000), IgG2a (1:20000), IgG2b (1:20000), IgG3 (1:20000), IgE (1:20) and IgM (1:5000) in serum from WT and AMPK-KO mice. **(B)** Concentration of antibodies to double stranded DNA in WT and AMPK-KO mice.

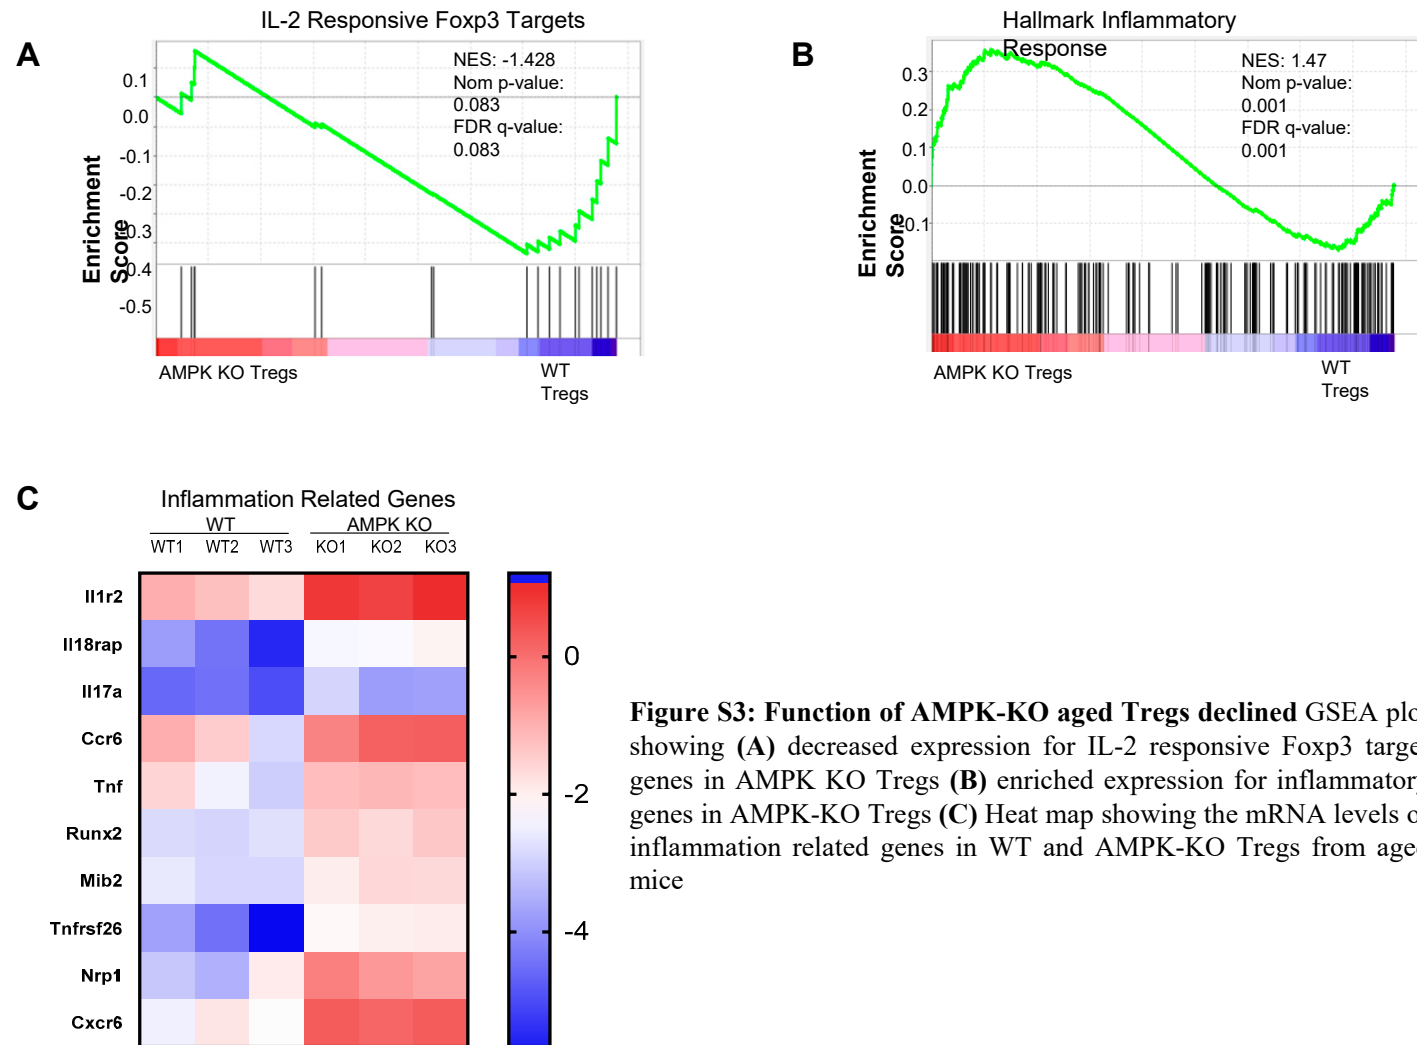

**Figure S3: Function of AMPK-KO aged Tregs declined** GSEA plot showing (A) decreased expression for IL-2 responsive Foxp3 target genes in AMPK KO Tregs (B) enriched expression for inflammatory genes in AMPK-KO Tregs (C) Heat map showing the mRNA levels of inflammation related genes in WT and AMPK-KO Tregs from aged mice
